# Supplementary material for: Unbridged Au(ii)–Au(ii) bonds are theoretically allowed
Source: Royal Society of Chemistry journal article supplement (doi:10.1039/c2cc37875b), 2013-01-01
Supplement: c2cc37875b.pdf [file c2cc37875b.pdf]

**Computational details:** The details of PBE calculations are same as in the paper. Gaussian09 was used for PBE0 [1], TPSS and TPSSh [2] calculations. cc-pVTZ (cc-pVTZ-PP for Au) basis sets were used in Gaussian calculations.

Table 1: Optimized geometries of  $X_4Au_2(C_5H_5N)_2$ , X = H, F-I and  $CF_3$  with PBE0, TPSS and TPSSh. cc-pVTZ basis sets was used. All bond lengths in pm and all angles in degree.

| X      | Functional | $R(Au-Au)$ | $R(Au-N)$ | $R(Au-X)$ | $\angle XAuX$ | $\angle XAuN$ |
|--------|------------|------------|-----------|-----------|---------------|---------------|
| H      | PBE0       | 247.8      | 215.5     | 163.8     | 172.8         | 93.6          |
|        | TPSS       | 249.4      | 216.8     | 165.0     | 174.0         | 93.0          |
|        | TPSSh      | 248.6      | 216.4     | 164.5     | 173.6         | 93.2          |
| F      | PBE0       | 250.0      | 215.7     | 193.0     | 179.0         | 89.5          |
|        | TPSS       | 252.2      | 218.0     | 195.3     | 178.9         | 89.4          |
|        | TPSSh      | 251.1      | 217.2     | 194.2     | 178.9         | 89.5          |
| Cl     | PBE0       | 252.4      | 217.2     | 229.2     | 175.0         | 92.5          |
|        | TPSS       | 254.6      | 219.3     | 231.6     | 175.3         | 92.4          |
|        | TPSSh      | 253.4      | 218.5     | 230.6     | 175.1         | 92.4          |
| Br     | PBE0       | 253.0      | 216.7     | 243.5     | 174.0         | 93.0          |
|        | TPSS       | 254.9      | 218.8     | 245.9     | 174.0         | 93.0          |
|        | TPSSh      | 253.8      | 218.0     | 244.8     | 173.9         | 93.1          |
| I      | PBE0       | 254.0      | 216.4     | 263.1     | 172.9         | 93.5          |
|        | TPSS       | 255.7      | 218.6     | 265.3     | 172.8         | 93.6          |
|        | TPSSh      | 254.7      | 217.8     | 264.2     | 172.7         | 93.7          |
| $CF_3$ | PBE0       | 251.7      | 215.0     | 209.2     | 177.4         | 88.7          |
|        | TPSS       | 253.8      | 217.7     | 211.2     | 177.1         | 88.5          |
|        | TPSSh      | 252.8      | 216.8     | 210.4     | 177.3         | 88.7          |

Table 2: Optimized geometries at the level of PBE/TZ2P/SR-ZORA for  $X_4Au_2(NH_3)_2$ ,  $X = H, F-I$ , all bond lengths in pm and all angles in degree.

ADF was used for these calculations.

| X  | $R(Au-Au)$ | $R(Au-N)$ | $R(Au-X)$ | $\angle XAuX$ | $\angle XAuN$ |
|----|------------|-----------|-----------|---------------|---------------|
| H  | 250.4      | 220.7     | 165.5     | 174.9         | 93.1          |
| F  | 253.5      | 219.5     | 196.7     | 177.2         | 91.4          |
| Cl | 255.5      | 219.5     | 231.4     | 179.0         | 88.6          |
| Br | 255.6      | 219.5     | 247.6     | 179.7         | 89.2          |
| I  | 256.3      | 220.0     | 266.1     | 178.9         | 90.8          |

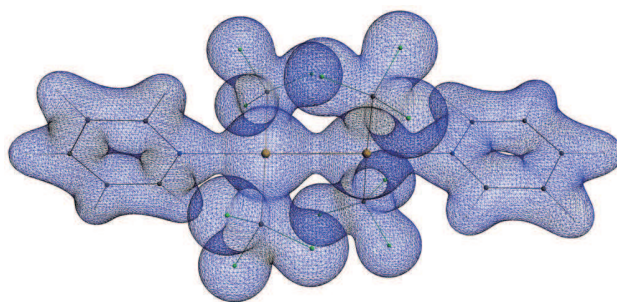

Figure 1: The electron density of  $(CF_3)_4Au_2(C_5H_5N)_2$ , isosurf. = 0.06 a.u.

## References

- [1] Adamo C and Barone V. Toward reliable density functional methods without adjustable parameters: The pbe0 model. *J. Chem. Phys.*, 110:6158–6169, 1999.
- [2] Jianmin Tao, John P. Perdew, Viktor N. Staroverov, and Gustavo E. Scuseria. Climbing the density functional ladder: Nonempiri-

cal meta-generalized gradient approximation designed for molecules and solids. *Phys. Rev. Lett.*, 91:146401, Sep 2003.
